# Supplementary material for: Chemical Bonding and Dynamic Structural Fluxionality of a Boron-Based Na5B7 Sandwich Cluster
Source: Molecules. 2023 Apr 6;28(7):3276. doi: 10.3390/molecules28073276 (PMC10096537; doi:10.3390/molecules28073276)

## SUPPLEMENTARY MATERIALS

### Chemical bonding and dynamic structural fluxionality of a boron-based Na<sub>5</sub>B<sub>7</sub> sandwich cluster

Peng-Fei Han,<sup>1</sup> Ying-Jin Wang,<sup>2</sup> Lin-Yan Feng,<sup>1,2</sup> Shu-Juan Gao,<sup>1</sup> Qiang Sun,<sup>3</sup> and Hua-Jin Zhai<sup>1,\*</sup>

<sup>1</sup>*Nanocluster Laboratory, Institute of Molecular Science, Shanxi University, Taiyuan 030006, China*

<sup>2</sup>*Department of Chemistry, Xinzhou Teachers University, Xinzhou 034000, China*

<sup>3</sup>*Center for Applied Physics and Technology, School of Materials Science and Engineering, Peking University, Beijing 100871, China*

\*E-mail: hj.zhai@sxu.edu.cn

**Table S1.** Cartesian coordinates for the global-minimum (GM) and transition state (TS) structures,  $C_{3v}$  ( $^1A_1$ ), of Na<sub>5</sub>B<sub>7</sub> cluster at the PBE0/6-311+G\* level.

**Figure S1.** Alternative optimized low-lying structures of Na<sub>5</sub>B<sub>7</sub> cluster at the PBE0/6-311+G\* level. Relative energies are shown without brackets at PBE0, including corrections for zero-point energies (ZPEs). Also shown are energies for top low-lying isomers at the single-point CCSD(T)/6-311+G\* (in square brackets) and B3LYP/6-311+G\* (in brackets) levels. All energies are in eV.

**Figure S2.** Geometries and energetics of the first 12 triplet-state structures of Na<sub>5</sub>B<sub>7</sub> cluster at the PBE0/6-311+G\* level. Relative energies are shown in eV with respect to the GM structure.

**Figure S3.** Calculated bond distances (in Å) for (a) GM  $C_{3v}$  ( $^1A_1$ ) and (b) TS  $C_{3v}$  ( $^1A_1$ ) structures of Na<sub>5</sub>B<sub>7</sub> cluster at the PBE0/6-311+G\* level.

- Figure S4.** Calculated natural atomic charges in  $|e|$  for (a) GM and (b) TS structures of  $\text{Na}_5\text{B}_7$  cluster at the PBE0/6-311+G\* level, as obtained from the natural bond orbital (NBO) analyses.
- Figure S5.** Calculated (a) bond distances (in Å), (b) Wiberg bond indices (WBIs), and (c) natural atomic charges (in  $|e|$ ) for a local-minimum (LM)  $C_{2v}$  ( $^1A_1$ ) structure of  $\text{Na}_5\text{B}_7$  cluster.
- Figure S6.** Calculated bond distances (black color, in Å) and WBIs (in pink) of a bare  $C_{6v}$   $\text{B}_7^{3-}$  model cluster at the PBE0/6-311+G\* level.
- Figure S7.** Pictures of canonical molecular orbitals (CMOs) of the TS  $C_{3v}$  ( $^1A_1$ ) structure of  $\text{Na}_5\text{B}_7$  cluster. (a) Six  $\sigma$  CMOs for peripheral two-center two-electron (2c-2e) B–B  $\sigma$  single bonds in the  $\text{B}_7$  wheel. (b) Three delocalized  $\pi$  CMOs. (c) Three delocalized  $\sigma$  CMOs. (d) One delocalized  $\sigma$  CMO for the top  $\text{Na}_4$  tetrahedron. Subsystems (b) through (d) collectively render three-fold  $6\pi/6\sigma/2\sigma$  aromaticity for TS  $C_{3v}$  ( $^1A_1$ ) structure.
- Figure S8.** Chemical bonding scheme of the TS  $C_{3v}$  ( $^1A_1$ ) structure for  $\text{Na}_5\text{B}_7$  cluster on the basis of adaptive natural density partitioning (AdNDP) analysis. Occupation numbers (ONs) are indicated.
- Figure S9.** The CMO pictures of a LM  $C_{2v}$  ( $^1A_1$ ) structure of  $\text{Na}_5\text{B}_7$  cluster. (a) Six  $\sigma$  CMOs for peripheral 2c-2e B–B  $\sigma$  single bonds in the  $\text{B}_7$  wheel. (b) Three delocalized  $\pi$  CMOs. (c) Three delocalized  $\sigma$  CMOs. (d) One  $\sigma$  CMO over the rhombic  $\text{Na}_4$  unit.
- Figure S10.** Chemical bonding scheme of a LM  $C_{2v}$  ( $^1A_1$ ) structure of  $\text{Na}_5\text{B}_7$  cluster on the basis of AdNDP analysis. The ONs are indicated.
- Figure S11.** Relative energies (in eV) for tetrahedral versus rhombic structures of a free-standing  $\text{Na}_4^{2+}$  model cluster at the PBE0/6-311+G\* level.

**Table S1.** Cartesian coordinates for the global-minimum (GM) and transition state (TS) structures,  $C_{3v}$  ( $^1A_1$ ), of  $Na_5B_7$  cluster at the PBE0/6-311+G\* level.

GM,  $Na_5B_7$  ( $C_{3v}$ ,  $^1A_1$ )

|    |             |             |             |
|----|-------------|-------------|-------------|
| B  | -1.61375400 | 0.00051400  | -1.29306500 |
| B  | -0.80643100 | 1.40566809  | -1.29306500 |
| B  | 0.80732200  | 1.39729500  | -1.29306500 |
| B  | 1.61375400  | 0.00051400  | -1.29306500 |
| B  | 0.80643100  | -1.39780900 | -1.29306500 |
| B  | -0.80732200 | 1.39729500  | -1.29306500 |
| B  | 0.00000000  | 0.00000000  | -0.98016900 |
| Na | 0.00000000  | 2.10180900  | 1.13529800  |
| Na | 0.00000000  | 0.00000000  | 4.05349300  |
| Na | -1.82022000 | -1.05090400 | 1.13529800  |
| Na | 1.82022000  | -1.05090400 | 1.13529800  |
| Na | 0.00000000  | 0.00000000  | -3.48731400 |

TS,  $Na_5B_7$  ( $C_{3v}$ ,  $^1A_1$ )

|   |             |             |             |
|---|-------------|-------------|-------------|
| B | -1.39887500 | 0.80764100  | -1.27191500 |
| B | -1.39553100 | -0.80571000 | -1.32879900 |
| B | 1.39887500  | 0.80764100  | -1.27191500 |
| B | 1.39553100  | -0.80571000 | -1.32879900 |
| B | 0.00000000  | -1.61528200 | -1.27191500 |
| B | 0.00000000  | 1.61142000  | -1.32879900 |
| B | 0.00000000  | 0.00000000  | -0.99539300 |

|    |             |             |             |
|----|-------------|-------------|-------------|
| Na | 0.00000000  | 2.06979600  | 1.14197700  |
| Na | 0.00000000  | 0.00000000  | 4.07153500  |
| Na | -1.79249600 | -1.03489800 | 1.14197700  |
| Na | 1.79249600  | -1.03489800 | 1.14197700  |
| Na | 0.00000000  | 0.00000000  | -3.49858600 |

**Figure S1.** Alternative optimized low-lying structures of  $\text{Na}_5\text{B}_7$  cluster at the PBE0/6-311+G\* level. Relative energies are shown without brackets at PBE0, including corrections for zero-point energies (ZPEs). Also shown are energies for top low-lying isomers at the single-point CCSD(T)/6-311+G\* (in square brackets) and B3LYP/6-311+G\* (in brackets) levels. All energies are in eV.

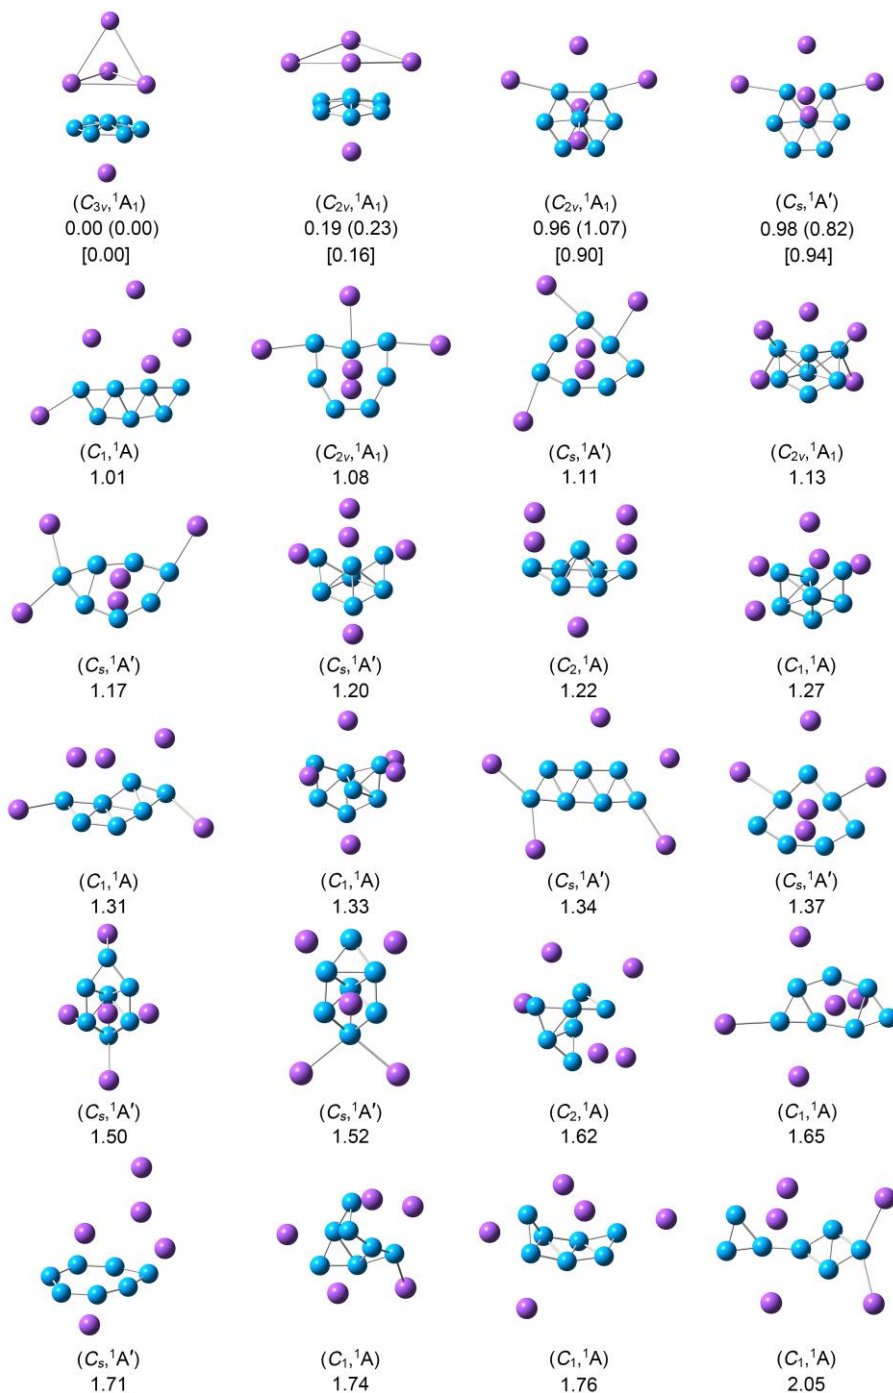

**Figure S2.** Geometries and energetics of the first 12 triplet-state structures of  $\text{Na}_5\text{B}_7$  cluster at the PBE0/6-311+G\* level. Relative energies are shown in eV with respect to the GM structure.

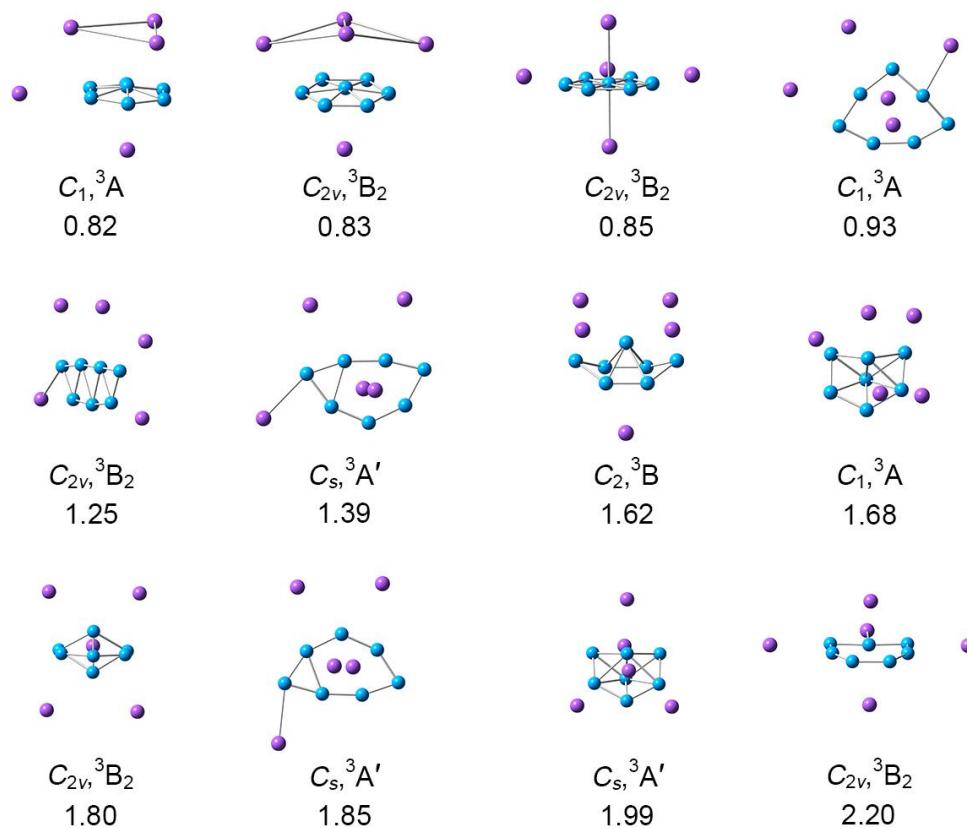

**Figure S3.** Calculated bond distances (in Å) for (a) GM  $C_{3v}$  ( $^1A_1$ ) and (b) TS  $C_{3v}$  ( $^1A_1$ ) structures of  $Na_5B_7$  cluster at the PBE0/6-311+G\* level.

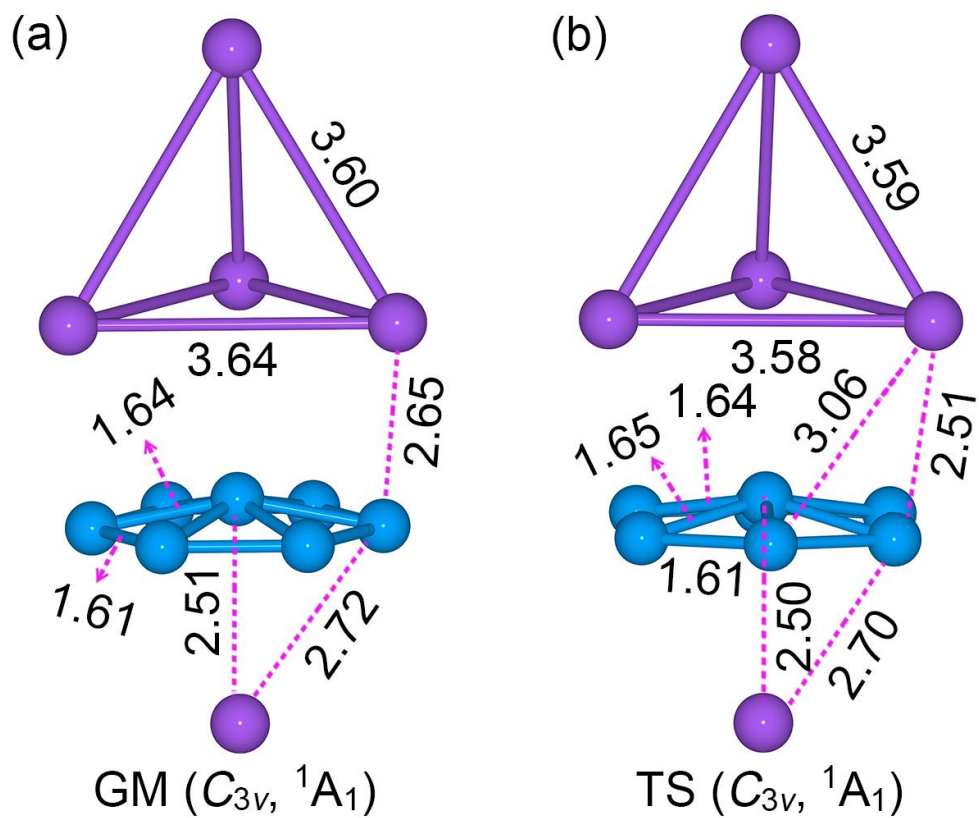

**Figure S4.** Calculated natural atomic charges in  $|e|$  for (a) GM and (b) TS structures of  $\text{Na}_5\text{B}_7$  cluster at the PBE0/6-311+G\* level, as obtained from the natural bond orbital (NBO) analyses.

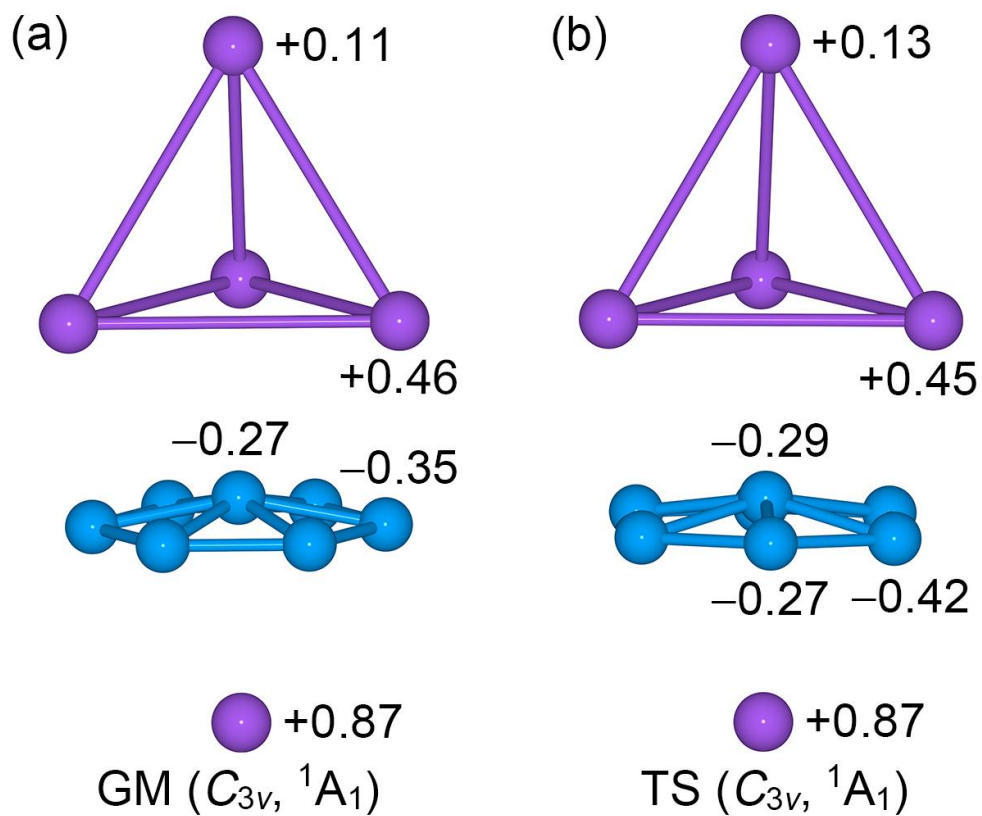

**Figure S5.** Calculated (a) bond distances (in Å), (b) Wiberg bond indices (WBIs), and (c) natural atomic charges (in |e|) for a local-minimum (LM)  $C_{2v}$  ( $^1A_1$ ) structure of  $Na_5B_7$  cluster.

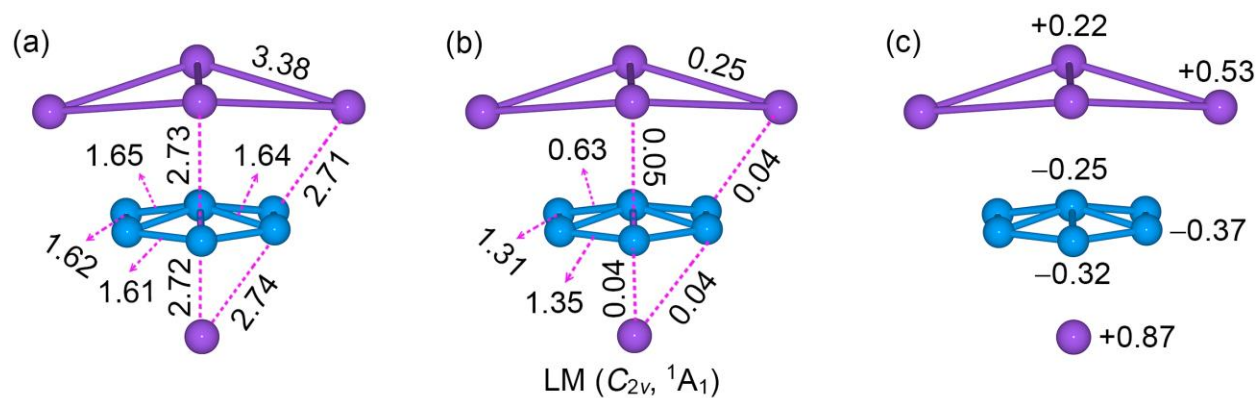

**Figure S6.** Calculated bond distances (black color, in Å) and WBIs (in pink) of a bare  $C_{6v}$   $B_7^{3-}$  model cluster at the PBE0/6-311+G\* level.

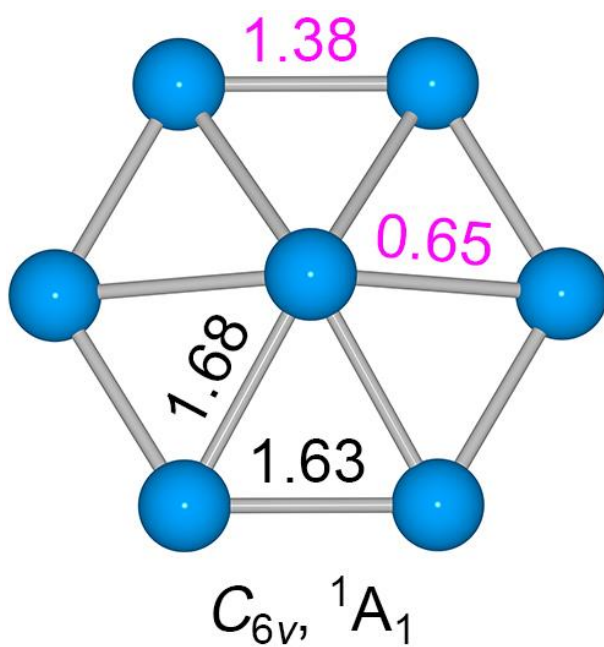

**Figure S7.** Pictures of canonical molecular orbitals (CMOs) of the TS  $C_{3v}$  ( $^1A_1$ ) structure of  $Na_5B_7$  cluster. (a) Six  $\sigma$  CMOs for peripheral two-center two-electron (2c-2e) B–B  $\sigma$  single bonds in the  $B_7$  wheel. (b) Three delocalized  $\pi$  CMOs. (c) Three delocalized  $\sigma$  CMOs. (d) One delocalized  $\sigma$  CMO for the top  $Na_4$  tetrahedron. Subsystems (b) through (d) collectively render three-fold  $6\pi/6\sigma/2\sigma$  aromaticity for TS  $C_{3v}$  ( $^1A_1$ ) structure.

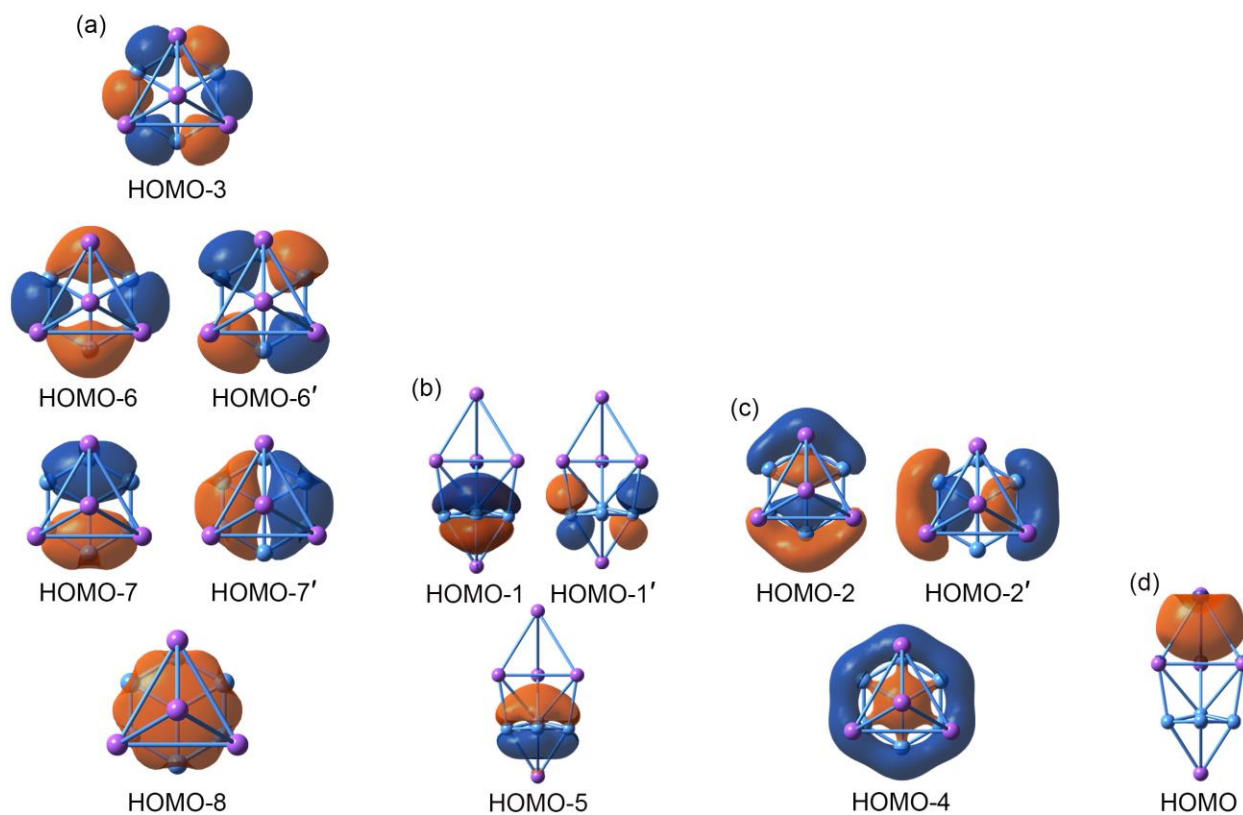

**Figure S8.** Chemical bonding scheme of the TS  $C_{3v}$  ( $^1A_1$ ) structure for  $Na_5B_7$  cluster on the basis of adaptive natural density partitioning (AdNDP) analysis. Occupation numbers (ONs) are indicated.

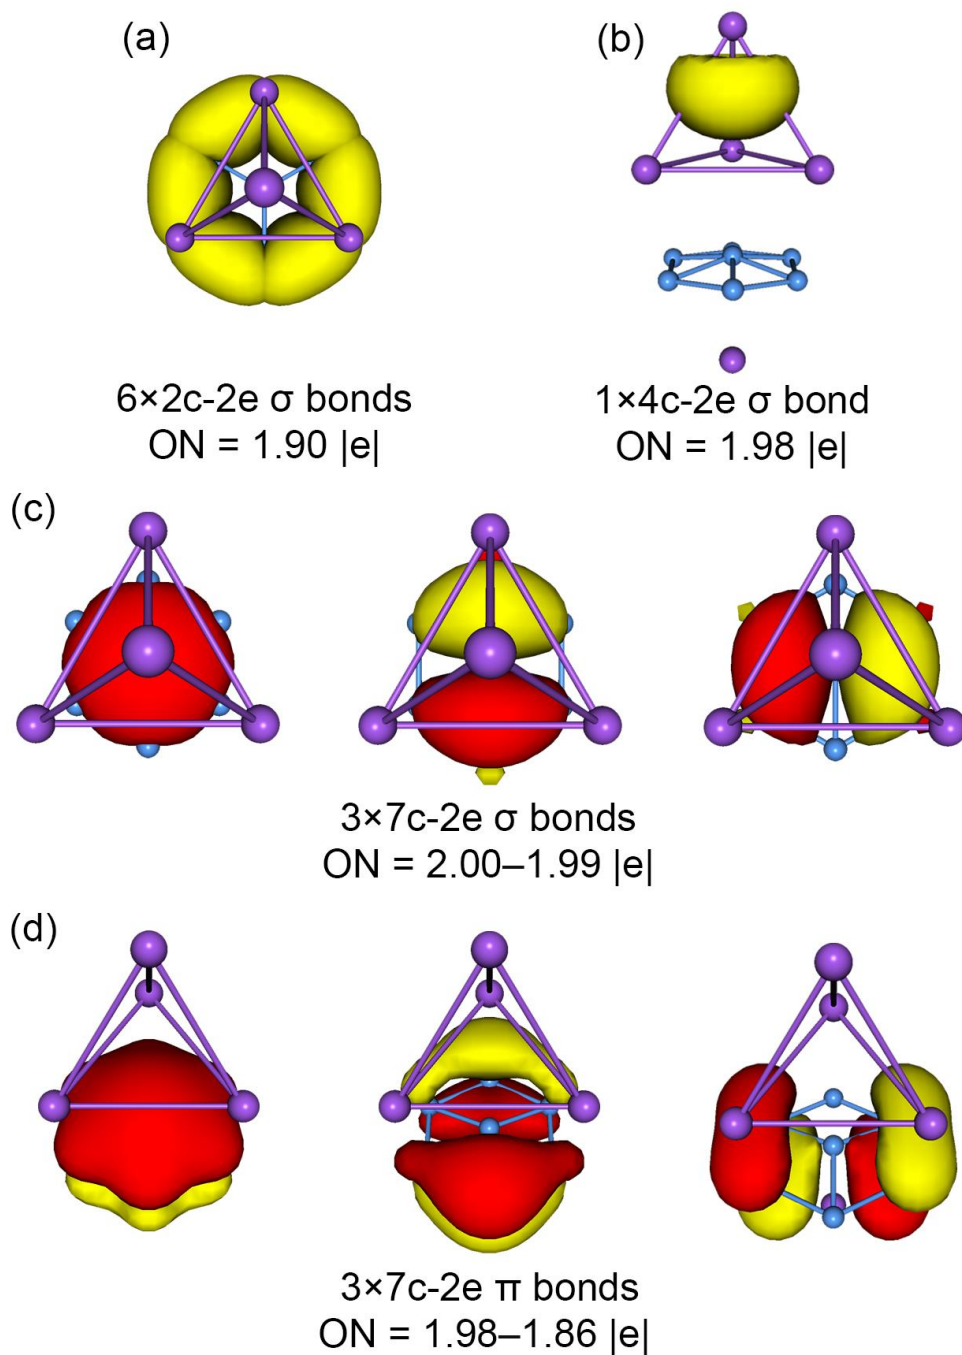

**Figure S9.** The CMO pictures of a LM  $C_{2v}$  ( $^1A_1$ ) structure of  $Na_5B_7$  cluster. (a) Six  $\sigma$  CMOs for peripheral 2c-2e B–B  $\sigma$  single bonds in the  $B_7$  wheel. (b) Three delocalized  $\pi$  CMOs. (c) Three delocalized  $\sigma$  CMOs. (d) One  $\sigma$  CMO over the rhombic  $Na_4$  unit.

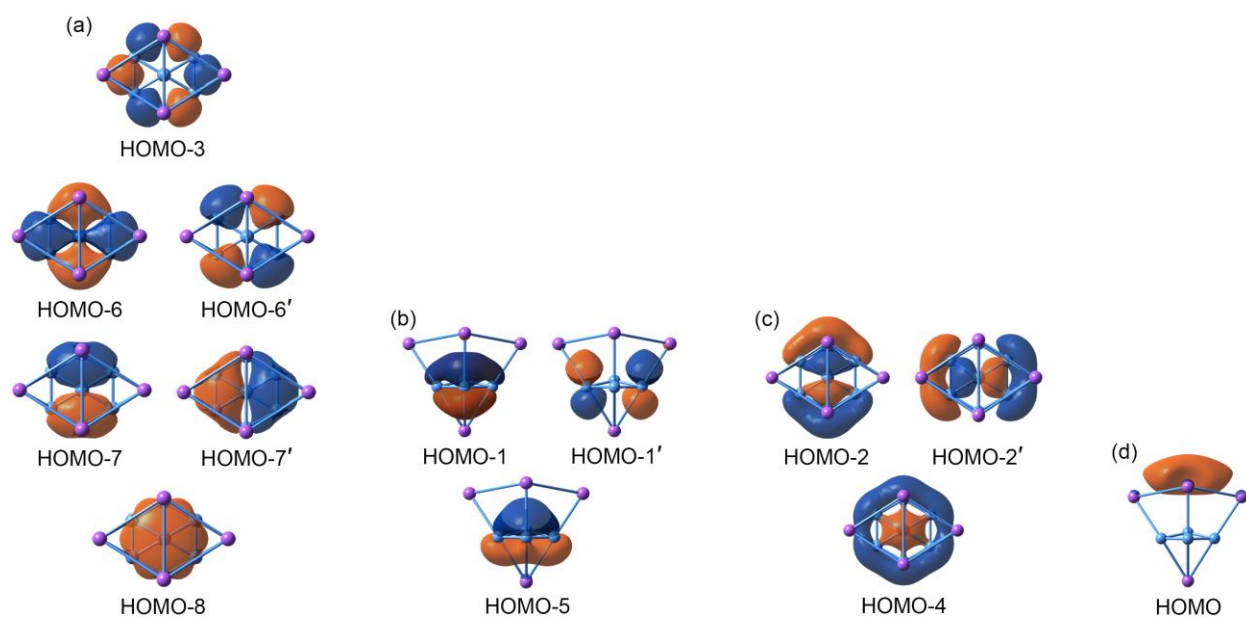

**Figure S10.** Chemical bonding scheme of a LM  $C_{2v}$  ( $^1A_1$ ) structure of  $Na_5B_7$  cluster on the basis of AdNDP analysis. The ONs are indicated.

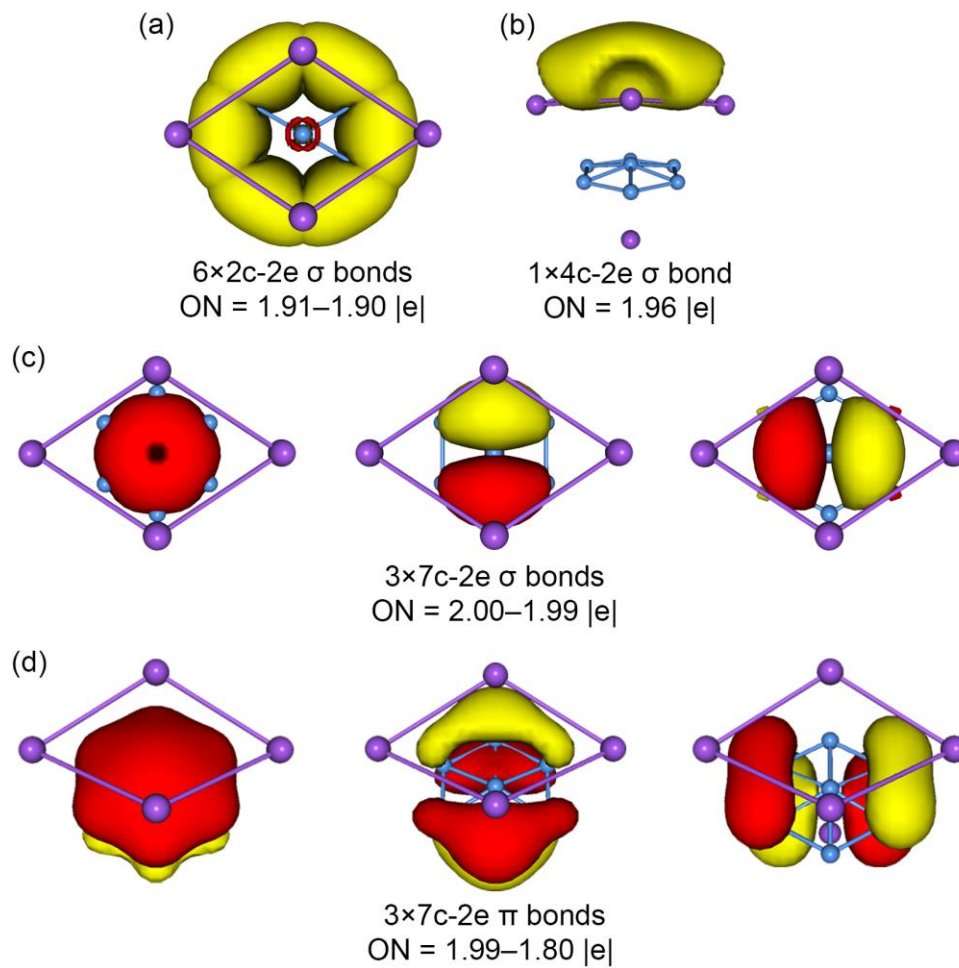

**Figure S11.** Relative energies (in eV) for tetrahedral versus rhombic structures of a free-standing  $\text{Na}_4^{2+}$  model cluster at the PBE0/6-311+G\* level.

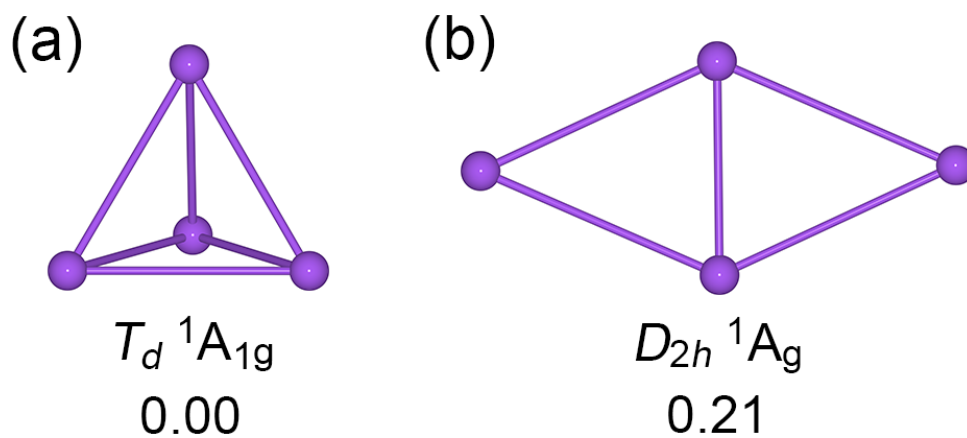

Supplement: Supplementary file 1 [file molecules-28-03276-s001.zip › R1_Molecules_dynamic_B7Na5_ESI.pdf]
