# Supplementary material for: Chemical Bonding and Dynamic Structural Fluxionality of a Boron-Based Na5B7 Sandwich Cluster
Source: Molecules. 2023 Apr 6;28(7):3276. doi: 10.3390/molecules28073276 (PMC10096537; doi:10.3390/molecules28073276)
Supplement: Supplementary file 1 [file molecules-28-03276-s001.zip › R1_Molecules_dynamic_B7Na5_TOC.pdf]

## Table of Contents:

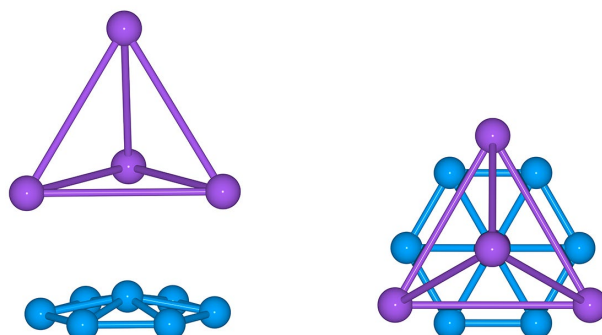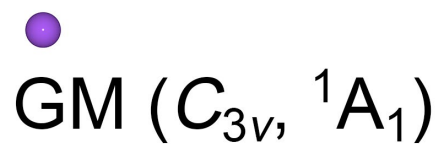

A three-layered charge-transfer  $[\text{Na}_4]^{2+}[\text{B}_7]^{3-}[\text{Na}]^+$  cluster has three-fold  $6\pi/6\sigma/2\sigma$  aromaticity. Its tetrahedral  $[\text{Na}_4]^{2+}$  ligand is a simple example of three-dimensional aromaticity or superatom.
